# Supplementary material
Source: Springer Nature journal article supplement (https://www.springermedizin.de/resource/supplementary/12872_2006_125_MOESM4_ESM.pdf/9431072)

MINAP Secondary prevention medications: patients discharged on beta blockers (%)

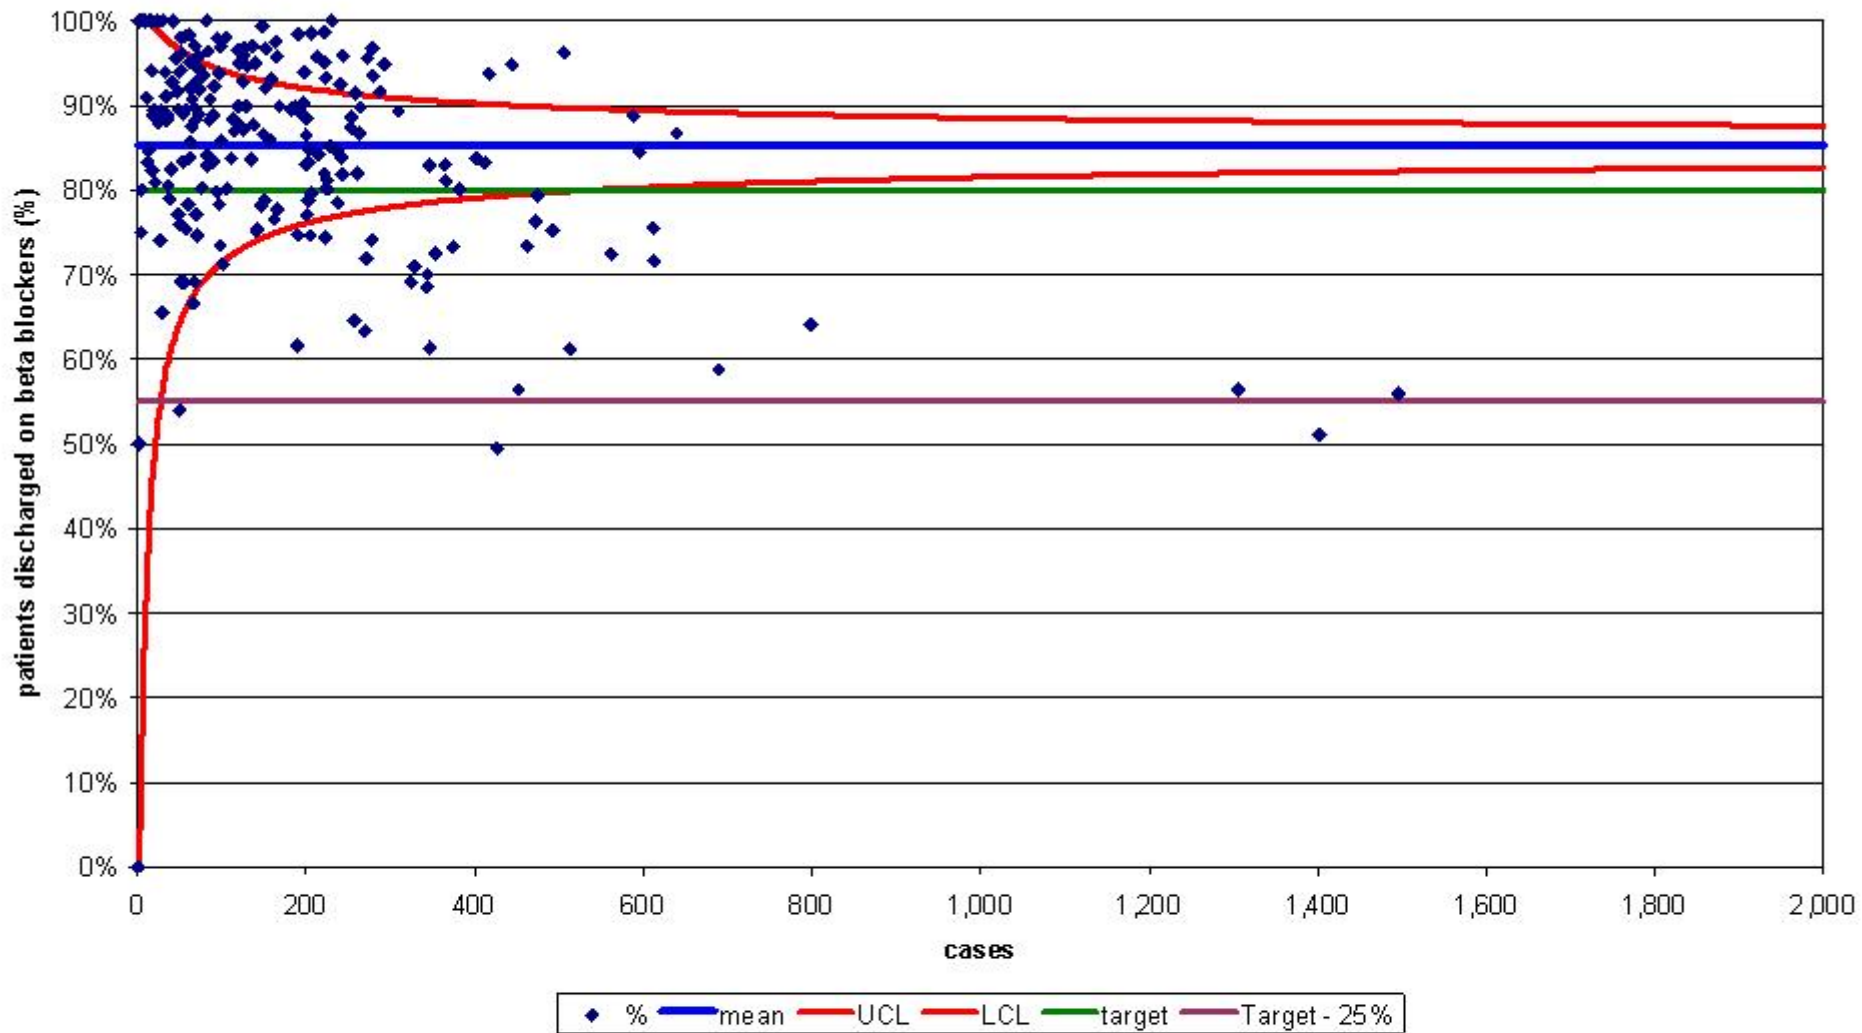

Supplement: MOESM4 [file 9431072]
